# Supplementary material
Source: Springer Nature journal article supplement (https://www.springermedizin.de/resource/supplementary/13256_2009_1093_MOESM2_ESM.pdf/9646990)

25/1

Physi  
U-B  
U-C  
x  
y

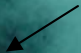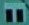

Supplement: MOESM2 [file 9646990]
